# Supplementary material
Source: HighWire-hosted journal article supplement (https://gut.bmj.com/content/gutjnl-2020-323868)
Supplement: inline-supplementary-material-3 [file inline-supplementary-material-3.xlsx]

## Sheet: Supplementary Table 2
Online Supplementary Table S2. HEM GWAS risk loci.
Loci number	CHR	start-end	Lead SNP (rsID)	BP	A1	A2	EAF	OR (95% CI)	P	Nearest gene	Association directions in individual cohorts
1	1	40257964-40301897	rs11585073	40275089	T	A	0.2451	1.06 (1.05-1.07)	3.875e-33	BMP8B (+7)	++++?
2	1	95203992-95309134	rs11578225	95237528	A	G	0.2141	0.97 (0.96-0.98)	6.361e-13	SLC44A3 (+3)	----+
3	1	169081792-169521553	rs145163454	169090748	C	T	0.0252	0.87 (0.85-0.89)	5.879e-28	ATP1B1 (+8)	-----
4	1	204449952-204599461	rs4951080	204533284	A	G	0.323	0.97 (0.97-0.98)	2.811e-09	MDM4 (+6)	--?--
5	1	219622596-219669226	rs2605097	219642109	C	A	0.3002	1.03 (1.02-1.03)	4.269e-09	na (+1)	+++++
6	2	20866699-20881840	rs7594056	20867744	A	G	0.3142	0.97 (0.96-0.97)	7.216e-15	GDF7 (+2)	----?
7	2	32499150-32849224	rs6723226	32849207	G	A	0.3513	1.02 (1.02-1.03)	1.985e-08	TTC27 (+9)	++-+-
8	2	36767257-36849220	rs4670149	36826170	T	A	0.3091	1.03 (1.02-1.04)	1.277e-09	FEZ2 (+1)	+++-+
9	2	45573050-45842064	rs728327	45775995	T	C	0.3445	0.97 (0.97-0.98)	2.977e-10	SRBD1 (+2)	-----
10	2	62926859-63298150	rs4671051	63032696	T	A	0.3572	1.02 (1.02-1.03)	7.517e-09	EHBP1 (+8)	+++++
11	2	64887382-65004346	rs34532102	64905182	T	C	0.2017	0.97 (0.96-0.98)	1.32e-08	SERTAD2 (+1)	-----
12	2	67874054-67954046	rs2861709	67900116	G	A	0.0591	1.05 (1.03-1.07)	2.379e-09	na (+5)	++?-+
13	2	112654009-113830959	rs57116599	112770799	A	G	0.225	1.03 (1.02-1.04)	1.48e-11	MERTK (+22)	+++++
14	2	145756260-145904907	rs7423637	145818064	T	A	0.3086	1.02 (1.02-1.03)	1.036e-08	na (+2)	+++++
15	2	148457312-148956584	rs7559714	148640768	C	T	0.3085	0.98 (0.97-0.99)	4.953e-08	ACVR2A (+5)	--?+-
16	2	160899369-161340963	rs4233681	160960058	C	T	0.478	0.97 (0.97-0.98)	2.041e-11	ITGB6 (+5)	----+
17	2	173943763-174074375	rs13017210	174008623	T	A	0.3859	0.97 (0.97-0.98)	3.83e-10	MAP3K20 (+1)	--?--
18	2	176962102-176974104	rs847148	176970456	T	A	0.3198	0.96 (0.96-0.97)	1.071e-17	HOXD11 (+8)	---+-
19	2	189998020-190359085	rs16831319	190150205	C	T	0.059	1.05 (1.03-1.07)	9.952e-09	COL5A2 (+6)	++++-
20	2	191259714-191478211	rs34417560	191435716	T	A	0.2476	1.03 (1.02-1.04)	2.472e-08	TMEM194B (+10)	++++-
21	3	14818716-14858226	rs1689549	14837473	C	T	0.1071	0.96 (0.95-0.98)	4.434e-09	FGD5 (+5)	-----
22	3	52214640-53171555	rs9847710	53062661	C	T	0.4149	1.04 (1.03-1.05)	1.229e-23	SFMBT1 (+52)	+++++
23	3	70779444-71074194	rs2597301	70909494	C	G	0.321	1.03 (1.02-1.04)	6.329e-14	FOXP1 (+2)	+++++
24	3	111419457-111521268	rs6792493	111477348	G	A	0.412	1.03 (1.02-1.04)	9.516e-15	PLCXD2 (+3)	+++-+
25	3	114498351-114520038	rs9853475	114500255	G	A	0.2826	0.97 (0.97-0.98)	1.959e-09	ZBTB20 (+0)	--+-+
26	3	156791268-156813672	rs900400	156798775	C	T	0.4116	0.97 (0.96-0.97)	5.022e-18	na (+6)	----+
27	3	159922979-160309529	rs3851366	160191374	C	T	0.4683	0.98 (0.97-0.98)	3.505e-10	KPNA4 (+13)	---+-
28	4	8354149-8525162	rs2631752	8405314	C	G	0.4986	1.02 (1.02-1.03)	4.415e-10	ACOX3 (+7)	+++++
29	4	39441490-39501647	rs2687965	39491521	A	G	0.4949	0.98 (0.97-0.98)	5.907e-09	UGDH (+5)	-----
30	4	75656079-75686640	rs11942410	75656079	T	C	0.2552	0.97 (0.96-0.98)	1.143e-08	BTC (+4)	---+-
31	4	95903741-96099025	rs28663472	95948204	T	C	0.4507	0.98 (0.97-0.98)	4.689e-10	BMPR1B (+1)	-----
32	4	106048360-106276493	rs6839705	106144735	A	C	0.3723	1.03 (1.02-1.04)	5.049e-12	TET2 (+4)	+++++
33	4	124632243-124746377	rs2060285	124746377	A	C	0.3365	1.02 (1.02-1.03)	4.194e-09	na (+3)	+++++
34	4	126893588-127030561	rs17824374	126924999	C	T	0.198	0.97 (0.96-0.98)	3.348e-11	na (+2)	-----
35	4	145227879-145517578	rs1542726	145515769	A	C	0.4246	1.03 (1.02-1.04)	2.532e-12	HHIP (+6)	++-++
36	5	507307-686244	rs72707023	667620	A	G	0.1777	0.96 (0.95-0.97)	2.369e-13	TPPP (+17)	---+-
37	5	15670234-15785038	rs61026653	15757570	G	A	0.1388	0.97 (0.96-0.98)	7.62e-09	FBXL7 (+2)	-----
38	5	50658334-50779225	rs62368263	50726027	C	T	0.1426	0.96 (0.95-0.97)	5.909e-15	ISL1 (+2)	-----
39	5	51105360-51158351	rs4485884	51108645	A	T	0.4263	1.02 (1.02-1.03)	5.6e-09	na (+3)	++-++
40	5	92948485-93571190	rs6867042	93555761	T	C	0.1252	0.97 (0.95-0.98)	6.017e-09	KIAA0825 (+6)	-----
41	5	97652398-97841726	rs1563319	97764143	T	A	0.4923	0.98 (0.97-0.98)	9.499e-09	na (+2)	-----
42	5	164487955-164786699	rs12153515	164631794	T	C	0.1274	1.04 (1.03-1.05)	7.333e-10	na (+3)	++++-
43	6	589924-646508	rs4959352	624922	C	A	0.3281	1.02 (1.02-1.03)	1.485e-08	EXOC2 (+5)	+++++
44	6	1767134-1777854	rs722587	1775714	T	A	0.2831	0.95 (0.94-0.96)	1.509e-31	GMDS (+1)	-----
45	6	17386607-17479588	rs10807610	17387538	C	A	0.1772	1.04 (1.03-1.05)	2.301e-12	CAP2 (+0)	+++-+
46	6	30062345-30071330	rs1156533	30065149	G	A	0.2952	0.98 (0.97-0.98)	1.755e-08	TRIM31 (+25)	---++
47	6	117723640-117823508	rs2180811	117780158	A	T	0.4831	1.03 (1.02-1.04)	1.94e-12	DCBLD1 (+7)	+++++
48	6	134150561-134209837	rs2327426	134202690	C	T	0.2949	0.97 (0.97-0.98)	2.679e-09	TCF21 (+3)	---+-
49	6	152027074-152052215	rs3020338	152034062	A	G	0.2453	0.97 (0.96-0.98)	2.234e-09	ESR1 (+0)	----+
50	6	152308973-152418575	rs9322356	152408659	A	G	0.0837	1.04 (1.03-1.06)	2.011e-08	ESR1 (+0)	+-+++
51	6	169569045-169618454	rs3253	169616112	T	C	0.3202	1.03 (1.02-1.04)	4.956e-12	THBS2 (+4)	+++++
52	7	40361834-40481812	rs6462976	40396300	T	C	0.4597	0.97 (0.96-0.98)	1.227e-12	SUGCT (+0)	-----
53	7	55103203-55161043	rs7795564	55124829	A	G	0.3923	0.97 (0.96-0.98)	3.376e-13	EGFR (+0)	-----
54	7	73146742-73461430	rs11770437	73319809	T	C	0.3592	0.96 (0.95-0.97)	3.183e-18	WBSCR28 (+12)	-----
55	7	100528223-100753880	rs4556017	100632790	C	T	0.1444	1.06 (1.05-1.07)	1.297e-22	MUC12 (+24)	+++++
56	7	102407236-103186271	rs7778418	102429704	C	T	0.3407	1.04 (1.03-1.05)	6.447e-18	FAM185A (+25)	+++-+
57	7	127264150-127757563	rs806169	127300668	C	G	0.3257	0.97 (0.96-0.98)	3.554e-11	SND1 (+8)	---+-
58	8	6361229-6655391	rs2912053	6645793	G	C	0.3983	1.04 (1.03-1.05)	2.347e-17	na (+4)	+++++
59	8	22447426-22542962	rs13271626	22467760	G	C	0.3295	1.03 (1.02-1.04)	3.426e-10	CCAR2 (+8)	++-++
60	8	71042430-72277688	rs1838392	71682583	T	G	0.3902	1.05 (1.05-1.06)	4.595e-39	XKR9 (+8)	+++++
61	8	77493526-77493526	rs2581260	77493526	A	T	0.1641	0.97 (0.96-0.98)	1.137e-09	na (+2)	-+-+-
62	8	130717716-130738972	rs10956488	130717755	G	A	0.1519	1.03 (1.02-1.04)	1.662e-09	GSDMC (+0)	+++-+
63	8	144973183-145086428	rs58579887	145028587	C	T	0.4046	1.03 (1.02-1.04)	1.666e-11	PLEC (+20)	+++-?
64	9	21995044-22125503	rs1333047	22124504	A	T	0.4999	1.04 (1.04-1.05)	7.763e-28	CDKN2B (+4)	+++++
65	9	94940133-95555488	rs755209	95489671	A	G	0.2767	1.02 (1.02-1.03)	3.064e-08	BICD2 (+17)	+++++
66	9	119155568-119238367	rs1858015	119167220	C	T	0.3229	0.97 (0.96-0.98)	6.088e-11	PAPPA (+3)	-----
67	9	136065526-136356448	rs676996	136146077	G	T	0.3414	0.94 (0.94-0.95)	5.261e-43	ABO (+23)	-----
68	10	24326623-24366458	rs6482359	24330805	A	G	0.3874	1.03 (1.02-1.04)	3.14e-11	KIAA1217 (+1)	++-++
69	10	126688200-126738634	rs3012065	126737579	C	T	0.3216	1.02 (1.02-1.03)	4.134e-08	CTBP2 (+2)	+++++
70	11	10377175-10386083	rs2218793	10380828	A	C	0.2871	1.03 (1.02-1.04)	1.051e-13	AMPD3 (+5)	+++++
71	11	10655021-10701556	rs4910165	10674044	C	G	0.3212	1.03 (1.03-1.04)	3.919e-16	MRVI1 (+5)	+++++
72	11	47372377-47989003	rs10838738	47663049	G	A	0.3524	1.03 (1.02-1.03)	1.689e-09	MTCH2 (+29)	+++++
73	11	69971277-70028543	rs2186797	70007770	C	T	0.0642	0.96 (0.94-0.97)	4.461e-08	ANO1 (+4)	+++-+
74	11	112788472-113034787	rs2212450	112826867	C	T	0.4342	1.03 (1.02-1.04)	5.425e-11	NCAM1 (+5)	++?+-
75	11	122991556-123026823	rs4345978	123009751	T	G	0.247	0.97 (0.96-0.98)	1.195e-13	CLMP (+2)	---++
76	12	20289914-20318700	rs11045079	20297976	G	A	0.1359	0.97 (0.95-0.98)	1.788e-09	na (+2)	-----
77	12	24424791-24442214	rs4579999	24439661	T	C	0.4662	1.03 (1.02-1.04)	3.318e-13	na (+1)	+++++
78	12	24714667-24802324	rs111235435	24757629	T	C	0.3757	1.02 (1.02-1.03)	5.023e-09	na (+2)	+++++
79	12	48164758-48181028	rs13632	48177238	A	G	0.2361	1.03 (1.02-1.04)	6.124e-11	HDAC7 (+7)	+++--
80	12	54353523-54376264	rs920778	54360232	G	A	0.3543	0.97 (0.97-0.98)	6.908e-10	HOXC11 (+11)	---+-
81	12	66326943-66413327	rs11176001	66409367	A	C	0.1293	0.92 (0.91-0.93)	2.485e-46	HMGA2 (+3)	-----
82	12	114632506-114687311	rs2555004	114686645	G	A	0.4885	0.98 (0.97-0.98)	5.355e-10	na (+2)	----+
83	13	51064533-51531815	rs7994724	51445560	A	G	0.3706	1.04 (1.03-1.04)	1.748e-17	DLEU7 (+5)	+++-+
84	15	32994056-33023486	rs11635984	33012232	C	T	0.3907	0.97 (0.96-0.98)	4.142e-13	GREM1 (+3)	-----
85	15	67437863-67468285	rs17293632	67442596	T	C	0.2373	1.06 (1.05-1.07)	6.881e-32	SMAD3 (+8)	+++++
86	15	68324830-68546275	rs12594232	68469402	G	A	0.446	0.98 (0.97-0.98)	1.003e-09	PIAS1 (+12)	-----
87	15	96100923-96139843	rs7183672	96101018	G	A	0.3203	1.03 (1.02-1.04)	1.204e-13	na (+1)	+++-+
88	16	15858791-15882857	rs6498573	15879373	T	C	0.1365	1.04 (1.03-1.05)	5.2e-12	MYH11 (+6)	+++++
89	16	86621902-86635787	rs4843407	86629047	A	G	0.2662	0.97 (0.96-0.98)	4.03e-12	FOXL1 (+2)	---+-
90	17	7417640-7571752	rs78378222	7571752	G	T	0.0125	1.12 (1.08-1.16)	4.661e-10	TP53 (+6)	+++-+
91	17	12394980-12410649	rs62061554	12401309	A	G	0.116	1.04 (1.03-1.05)	2.636e-10	na (+1)	+++++
92	17	17883848-18036283	rs854786	18036283	G	A	0.3192	0.98 (0.97-0.98)	1.251e-08	MYO15A (+17)	---+-
93	17	29400158-29735829	rs2525570	29681245	A	G	0.3949	0.98 (0.97-0.98)	6.79e-10	NF1 (+10)	----+
94	17	64236318-64331156	rs4423457	64284000	A	G	0.4196	0.98 (0.97-0.99)	3.359e-08	PRKCA (+2)	-----
95	19	11262477-11277074	rs2421206	11262477	G	T	0.3473	1.03 (1.02-1.04)	2.285e-14	SPC24 (+1)	+++++
96	19	44358042-44432840	rs8106090	44371210	G	A	0.492	1.02 (1.01-1.03)	3.339e-08	ZNF404 (+18)	++--+
97	20	56016072-56029604	rs34161672	56020599	A	G	0.3248	0.97 (0.96-0.98)	4.175e-12	RBM38 (+1)	---+?
98	20	58993857-59049432	rs35384758	58998651	G	A	0.2364	1.03 (1.02-1.04)	3.974e-08	na (+2)	+++++
99	21	30309586-30843684	rs2832279	30613466	A	C	0.3528	1.03 (1.02-1.04)	4.457e-11	BACH1 (+20)	++++-
100	22	29669693-29793525	rs174767	29740728	A	G	0.3843	0.98 (0.97-0.99)	1.446e-08	AP1B1 (+11)	-----
101	X	37933437-38064927	rs35318931	38009121	A	G	0.0804	0.96 (0.95-0.97)	3.158e-11	SRPX (+2)	--??-
102	X	109682057-109940577	rs5942977	109833905	A	G	0.4023	0.98 (0.97-0.99)	6.872e-10	CHRDL1 (+2)	--??-
