# Supplementary material
Source: HighWire-hosted journal article supplement (https://gut.bmj.com/content/gutjnl-2020-323868)
Supplement: inline-supplementary-material-9 [file inline-supplementary-material-9.xlsx]

## Sheet: Supplementary Table S8
Online Supplementary Table S8. Gene set and tissue enrichment analyses of HEM genes.
Genesets	Category	P.FDR.FUMA	P.FDR.MAGMA	P.FDR.DEPICT
positive regulation of interleukin 6 production	GO_BP	0.0106	0.56294	-
tube morphogenesis	GO_BP	0.0122	0.0034265	0.0364563
negative regulation of mitotic cell cycle	GO_BP	0.0122	0.392628	1
skeletal system development	GO_BP	0.0183	0.0350993	0.0358107
regulation of anatomical structure morphogenesis	GO_BP	0.0183	0.107704	0.299853
inflammatory response	GO_BP	0.0211	0.118497	1
regulation of vasculature development	GO_BP	0.0215	0.304117	-
tube development	GO_BP	0.0243	0.00460308	0.0239491
embryo development	GO_BP	0.055	0.00549789	-
fibroblast proliferation	GO_BP	0.0606	0.00374504	0.76613
embryonic morphogenesis	GO_BP	0.0687	0.0253065	0.125862
regulation of response to stress	GO_BP	0.0687	0.0047346	-
regulation of cell population proliferation	GO_BP	0.0765	0.0203153	-
positive regulation of transcription by rna polymerase ii	GO_BP	0.0843	0.00460308	-
positive regulation of rna biosynthetic process	GO_BP	0.0854	0.00170357	-
positive regulation of rna polymerase ii transcriptional preinitiation complex assembly	GO_BP	0.0854	0.0228278	-
spinal cord motor neuron cell fate specification	GO_BP	0.0982	0.00762735	-
appendage morphogenesis	GO_BP	0.0989	0.0417552	0.315036
ameboidal type cell migration	GO_BP	0.0997	0.00513091	-
proximal distal pattern formation	GO_BP	0.1	0.0429187	-
tissue morphogenesis	GO_BP	0.118	0.0108049	0.0112442
neuron fate specification	GO_BP	0.118	0.046617	0.772353
positive regulation of biosynthetic process	GO_BP	0.142	0.00430317	-
tissue remodeling	GO_BP	0.145	0.709017	0.0491708
macrophage colony stimulating factor production	GO_BP	0.157	0.0253065	-
osteoblast differentiation	GO_BP	0.157	0.0379963	0.147243
positive regulation of signaling	GO_BP	0.173	0.0429187	-
appendage development	GO_BP	0.181	0.0146423	0.243484
positive regulation of gene expression	GO_BP	0.181	0.00383303	-
chromatin organization	GO_BP	0.184	0.0449965	1
response to growth factor	GO_BP	0.194	0.00460308	-
animal organ morphogenesis	GO_BP	0.239	0.00218676	-
positive regulation of fibroblast proliferation	GO_BP	0.259	0.00558638	0.82006
muscle tissue development	GO_BP	0.317	0.00218676	0.0678764
embryo development ending in birth or egg hatching	GO_BP	0.333	0.00558638	0.0956033
mesenchymal cell differentiation	GO_BP	0.333	0.01786	0.112661
muscle organ development	GO_BP	0.333	0.00549789	0.152294
morphogenesis of an epithelium	GO_BP	0.357	0.0489445	0.0147172
cardiac muscle cell myoblast differentiation	GO_BP	0.357	0.0376985	-
negative regulation of rna biosynthetic process	GO_BP	0.367	0.0214349	-
mesonephros development	GO_BP	0.368	0.0104353	0.763453
mesonephric tubule morphogenesis	GO_BP	0.378	0.0119471	-
negative regulation of developmental process	GO_BP	0.378	0.0253065	0.473191
regulation of cellular response to stress	GO_BP	0.378	0.0332592	0.832203
branching morphogenesis of an epithelial tube	GO_BP	0.406	0.0150722	-
morphogenesis of a branching structure	GO_BP	0.407	0.00673894	0.0158279
activin receptor signaling pathway	GO_BP	0.463	0.0383005	0.837264
cartilage development	GO_BP	0.474	0.692708	0.0127059
sensory system development	GO_BP	0.487	0.01786	-
nephron morphogenesis	GO_BP	0.489	0.0189656	0.335891
muscle structure development	GO_BP	0.507	0.0128279	0.0872558
epithelial tube morphogenesis	GO_BP	0.509	0.00673894	0.0759255
sensory organ development	GO_BP	0.521	0.0253065	0.399037
cell proliferation involved in heart morphogenesis	GO_BP	0.53	0.0383005	-
mesenchyme development	GO_BP	0.54	0.00549789	0.102924
cardioblast differentiation	GO_BP	0.553	0.0047346	0.888976
skeletal system morphogenesis	GO_BP	0.694	0.0114132	0.225048
positive regulation of intracellular signal transduction	GO_BP	0.704	0.0462139	-
negative regulation of biosynthetic process	GO_BP	0.738	0.0203153	-
adrenal gland development	GO_BP	0.753	0.0253065	1
stem cell differentiation	GO_BP	0.762	0.00506143	0.870704
reproductive system development	GO_BP	0.809	0.0449965	-
bone development	GO_BP	0.873	0.224829	0.0470856
heart development	GO_BP	0.873	0.0647387	0.0460641
formation of primary germ layer	GO_BP	0.897	0.0256097	0.184818
mesoderm morphogenesis	GO_BP	0.908	0.0394774	0.0726693
mesodermal cell differentiation	GO_BP	0.908	0.148486	0.0239491
positive regulation of cell population proliferation	GO_BP	0.908	0.0316213	-
supramolecular fiber organization	GO_BP	0.908	0.0392318	-
outflow tract morphogenesis	GO_BP	0.921	0.00401471	0.803874
mesoderm development	GO_BP	0.94	0.0278878	0.427485
extracellular structure organization	GO_BP	0.958	0.0719582	0.0262382
camera type eye development	GO_BP	0.996	0.0253065	-
artery morphogenesis	GO_BP	-	0.0047346	0.0397705
smooth muscle tissue development	GO_BP	-	0.0301187	0.0279882
aging	GO_BP	-	0.821363	0.0393965
artery development	GO_BP	-	0.0119471	0.0681636
atrial septum morphogenesis	GO_BP	-	0.0471972	-
cardiac atrium development	GO_BP	-	0.0108761	1
exocrine system development	GO_BP	-	0.106947	0.0414997
heart morphogenesis	GO_BP	-	0.0368351	0.260248
integrin biosynthetic process	GO_BP	-	0.0301187	-
mammary gland branching involved in pregnancy	GO_BP	-	0.0429187	-
mesenchyme morphogenesis	GO_BP	-	0.0429187	0.569428
muscle cell proliferation	GO_BP	-	0.0166619	0.260661
myotube differentiation	GO_BP	-	0.262809	0.0460641
negative regulation of chondrocyte differentiation	GO_BP	-	0.680022	0.0122371
negative regulation of smooth muscle cell apoptotic process	GO_BP	-	0.0166281	-
neural crest cell differentiation	GO_BP	-	0.0392318	0.115803
paraxial mesoderm development	GO_BP	-	0.0114132	0.211503
paraxial mesoderm morphogenesis	GO_BP	-	0.00673894	-
positive regulation of alkaline phosphatase activity	GO_BP	-	0.0277501	-
positive regulation of cardiac muscle tissue development	GO_BP	-	0.0253065	-
positive regulation of cellular component organization	GO_BP	-	0.0407738	0.402135
regulation of alkaline phosphatase activity	GO_BP	-	0.0368351	-
regulation of cardiocyte differentiation	GO_BP	-	0.0379963	-
regulation of cell fate specification	GO_BP	-	0.0449965	1
regulation of epithelial cell proliferation involved in lung morphogenesis	GO_BP	-	0.0286454	-
regulation of lung blood pressure	GO_BP	-	0.00680613	-
regulation of mesoderm formation	GO_BP	-	0.0489445	-
regulation of mesodermal cell differentiation	GO_BP	-	0.0489445	-
regulation of mesodermal cell fate specification	GO_BP	-	0.0489445	-
regulation of muscle organ development	GO_BP	-	0.00460308	0.523602
regulation of phosphorus metabolic process	GO_BP	-	0.036132	-
skeletal muscle cell differentiation	GO_BP	-	0.646194	0.0460641
smooth muscle contraction	GO_BP	-	0.785641	0.0414997
smoothened signaling pathway	GO_BP	-	0.827453	0.0393965
tendon development	GO_BP	-	0.045245	-
tricuspid valve development	GO_BP	-	0.0429187	-
tricuspid valve morphogenesis	GO_BP	-	0.0253065	-
extracellular matrix	GO_CC	0.139	0.0490484	0.407192
collagen containing extracellular matrix	GO_CC	0.24	0.0449965	-
transcription factor complex	GO_CC	-	0.432859	0.0460641
interleukin 1 receptor binding	GO_MF	5.08e-07	0.746635	-
growth factor receptor binding	GO_MF	0.00755	0.378155	0.721452
cytokine receptor binding	GO_MF	0.01	0.844192	0.898386
cytokine activity	GO_MF	0.0109	0.816367	0.646122
signaling receptor binding	GO_MF	0.0311	0.128443	-
nuclear hormone receptor binding	GO_MF	0.0385	0.00599497	0.666775
hormone receptor binding	GO_MF	0.0845	0.0357666	1
nuclear receptor binding	GO_MF	0.0845	0.00673894	-
rna polymerase ii specific dna binding transcription factor binding	GO_MF	0.0845	0.00573019	-
transmembrane receptor protein kinase activity	GO_MF	0.0845	0.00374504	0.279225
dna binding transcription factor binding	GO_MF	0.147	0.0181972	-
smad binding	GO_MF	0.299	0.0503328	0.0364563
transcription factor binding	GO_MF	0.742	0.0535181	0.0377783
transmembrane receptor protein serine threonine kinase activity	GO_MF	0.764	0.00673894	-
activin activated receptor activity	GO_MF	-	0.0429187	-
bmp receptor activity	GO_MF	-	0.0429187	-
chromatin dna binding	GO_MF	-	0.443441	0.0136907
regulatory region nucleic acid binding	GO_MF	-	0.0128279	0.0774
transforming growth factor beta receptor activity type i	GO_MF	-	0.0122074	-
colon	GTEx tissue	0.00747568	0.0007575	0.0261798
blood vessel	GTEx tissue	0.00976	0.00372	0.0995985
esophagus	GTEx tissue	0.507	0.00437143	0.0048279
vagina	GTEx tissue	0.525	0.00986667	0.0995985
bladder	GTEx tissue	0.709	0.000375	0.0995985
cervix uteri	GTEx tissue	0.709	2.181e-06	0.134527
prostate	GTEx tissue	0.938	0.001284	0.075171
stomach	GTEx tissue	1	0.0092625	0.0189406
uterus	GTEx tissue	1	4.95e-05	0.0995985
persistent truncus arteriosis	Mammalian Phenotype Ontology	-	-	0.00223127
abnormal placental labyrinth vasculature morphology	Mammalian Phenotype Ontology	-	-	0.00488653
abnormal vascular smooth muscle morphology	Mammalian Phenotype Ontology	-	-	0.00832674
abnormal blood vessel morphology	Mammalian Phenotype Ontology	-	-	0.0109866
abnormal Wolffian duct morphology	Mammalian Phenotype Ontology	-	-	0.011246
complete embryonic lethality during organogenesis	Mammalian Phenotype Ontology	-	-	0.0146813
short maxilla	Mammalian Phenotype Ontology	-	-	0.0213993
enlarged kidney	Mammalian Phenotype Ontology	-	-	0.0213993
abnormal artery morphology	Mammalian Phenotype Ontology	-	-	0.021782
abnormal posterior eye segment morphology	Mammalian Phenotype Ontology	-	-	0.0238653
ovary cysts	Mammalian Phenotype Ontology	-	-	0.0279828
abnormal intestine morphology	Mammalian Phenotype Ontology	-	-	0.0279828
postnatal growth retardation	Mammalian Phenotype Ontology	-	-	0.0279828
perimembraneous ventricular septal defect	Mammalian Phenotype Ontology	-	-	0.0279828
pale yolk sac	Mammalian Phenotype Ontology	-	-	0.0282059
abnormal fourth branchial arch artery morphology	Mammalian Phenotype Ontology	-	-	0.0317239
abnormal cartilage development	Mammalian Phenotype Ontology	-	-	0.033933
renal hypoplasia	Mammalian Phenotype Ontology	-	-	0.0365696
abnormal placenta labyrinth morphology	Mammalian Phenotype Ontology	-	-	0.0377488
abnormal skeleton morphology	Mammalian Phenotype Ontology	-	-	0.0377488
hemorrhage	Mammalian Phenotype Ontology	-	-	0.0377488
cleft secondary palate	Mammalian Phenotype Ontology	-	-	0.038241
rectal prolapse	Mammalian Phenotype Ontology	-	-	0.0395768
hydroureter	Mammalian Phenotype Ontology	-	-	0.0414554
abnormal vascular smooth muscle physiology	Mammalian Phenotype Ontology	-	-	0.0414554
abnormal kidney morphology	Mammalian Phenotype Ontology	-	-	0.0414554
abnormal palatal shelf elevation	Mammalian Phenotype Ontology	-	-	0.0414554
absent stapes	Mammalian Phenotype Ontology	-	-	0.0414554
abnormal craniofacial bone morphology	Mammalian Phenotype Ontology	-	-	0.0460603
abnormal fibula morphology	Mammalian Phenotype Ontology	-	-	0.0460603
abnormal basement membrane morphology	Mammalian Phenotype Ontology	-	-	0.0460603
abnormal cartilage morphology	Mammalian Phenotype Ontology	-	-	0.0460603
partial perinatal lethality	Mammalian Phenotype Ontology	-	-	0.0470358
split xiphoid process	Mammalian Phenotype Ontology	-	-	0.0475943
abnormal third branchial arch artery morphology	Mammalian Phenotype Ontology	-	-	0.0492371
bradykinesia	Mammalian Phenotype Ontology	-	-	0.0492371
